# Supplementary material for: Prevalence of potentially inappropriate medications and prescription dynamics in elderly hospitalized patients in Spain
Source: PubMed Central journal article supplement — BMC Geriatr. 2024 Sep 30;24:798. doi: 10.1186/s12877-024-05308-3 (PMC11443693; doi:10.1186/s12877-024-05308-3), 2024-09-30
Supplement: 12877_2024_5308_MOESM1_ESM.pdf [file 12877_2024_5308_MOESM1_ESM.pdf]

## Supplementary material

**Supplementary Table 1.** Common list of potentially inappropriate medications (N=56) for all 16 hospitals included in the study

| List of Medications                | Concern (risk/effect)                                                                                                                                                                                                                                                                                                                                                                                                   | Alternative Treatment / Recommendation                                                                                                                                                                                                                                                        | Criteria    |
|------------------------------------|-------------------------------------------------------------------------------------------------------------------------------------------------------------------------------------------------------------------------------------------------------------------------------------------------------------------------------------------------------------------------------------------------------------------------|-----------------------------------------------------------------------------------------------------------------------------------------------------------------------------------------------------------------------------------------------------------------------------------------------|-------------|
| <b>GASTROINTESTINAL SYSTEM</b>     |                                                                                                                                                                                                                                                                                                                                                                                                                         |                                                                                                                                                                                                                                                                                               |             |
| Paraffin                           | Risk of aspiration and adverse effects.                                                                                                                                                                                                                                                                                                                                                                                 | Evaluate the use of osmotic laxatives.                                                                                                                                                                                                                                                        | B, P, CGE   |
| Paraffin in combination            |                                                                                                                                                                                                                                                                                                                                                                                                                         |                                                                                                                                                                                                                                                                                               | B, P, CGE   |
| <b>HORMONES AND RELATED AGENTS</b> |                                                                                                                                                                                                                                                                                                                                                                                                                         |                                                                                                                                                                                                                                                                                               |             |
| Megestrol                          | Indicated only for anorexia-cachexia in cancer patients. Risk of thrombotic events.                                                                                                                                                                                                                                                                                                                                     | Evaluate thrombotic risk and avoid use in cases of clear cardiovascular risk. Avoid prolonged treatments if there is no adequate clinical response.                                                                                                                                           | B, CGE      |
| <b>AINE</b>                        |                                                                                                                                                                                                                                                                                                                                                                                                                         |                                                                                                                                                                                                                                                                                               |             |
| Indomethacin                       | Increased gastrointestinal risk and peptic ulcer, especially in patients $\geq 75$ years and/or treated with corticosteroids, anticoagulants, or antiplatelets.<br><br>This risk increases with the duration of treatment. Additionally, indomethacin has a higher risk of central adverse effects than other NSAIDs.<br><br>Etoricoxib: in addition to gastrointestinal risk, it has cardiovascular contraindications. | If an NSAID is essential, use the minimum effective dose for the shortest duration possible. The choice of NSAID should be based on gastrointestinal, cardiovascular, and renal risk. Whenever possible, the NSAIDs of choice in our environment are ibuprofen (< 1,200 mg/day) and naproxen. | B, P        |
| Diclofenac                         |                                                                                                                                                                                                                                                                                                                                                                                                                         |                                                                                                                                                                                                                                                                                               | B, EU       |
| Diclofenac in combination          |                                                                                                                                                                                                                                                                                                                                                                                                                         |                                                                                                                                                                                                                                                                                               |             |
| Aceclofenac                        |                                                                                                                                                                                                                                                                                                                                                                                                                         |                                                                                                                                                                                                                                                                                               | CGE, AEMPS  |
| Piroxicam                          |                                                                                                                                                                                                                                                                                                                                                                                                                         |                                                                                                                                                                                                                                                                                               | B, P        |
| Meloxicam                          |                                                                                                                                                                                                                                                                                                                                                                                                                         |                                                                                                                                                                                                                                                                                               | B, EU, P    |
| Ketoprofen                         |                                                                                                                                                                                                                                                                                                                                                                                                                         |                                                                                                                                                                                                                                                                                               | B, P        |
| Dexketoprofen                      |                                                                                                                                                                                                                                                                                                                                                                                                                         |                                                                                                                                                                                                                                                                                               | B, EU       |
| Dexketoprofen with tramadol        |                                                                                                                                                                                                                                                                                                                                                                                                                         |                                                                                                                                                                                                                                                                                               |             |
| Etoricoxib                         |                                                                                                                                                                                                                                                                                                                                                                                                                         |                                                                                                                                                                                                                                                                                               | EU, P       |
| <b>ANTIBIOTICS</b>                 |                                                                                                                                                                                                                                                                                                                                                                                                                         |                                                                                                                                                                                                                                                                                               |             |
| Nitrofurantoin                     | Risk of pulmonary, hepatic, and peripheral neuropathy toxicity, especially long-term.                                                                                                                                                                                                                                                                                                                                   | Evaluate safer alternatives based on the antibiogram. Use only for acute cystitis (not as prophylaxis) with a maximum treatment duration of 7 days.                                                                                                                                           | B, P, AEMPS |

| List of Medications                                                 | Concern (risk/effect)                                                                            | Alternative Treatment / Recommendation                                                                                                                                         | Criteria  |
|---------------------------------------------------------------------|--------------------------------------------------------------------------------------------------|--------------------------------------------------------------------------------------------------------------------------------------------------------------------------------|-----------|
| <b>HYPOGLYCEMICS</b>                                                |                                                                                                  |                                                                                                                                                                                |           |
| Glibenclamide                                                       | Prolonged half-life sulfonylureas can cause severe prolonged hypoglycaemia.                      | Gliclazide or glipizide are recommended as the sulfonylureas of choice.                                                                                                        | B, SS, EU |
| Glimepiride                                                         |                                                                                                  |                                                                                                                                                                                | B, SS, EU |
| Glimepiride in combination                                          |                                                                                                  |                                                                                                                                                                                | B, SS, EU |
| <b>CENTRAL ANTIADRENERGICS</b>                                      |                                                                                                  |                                                                                                                                                                                |           |
| Methyldopa                                                          | High risk of central adverse effects. Not recommended as first-line treatment or in combination. | Evaluate the use of a preferred antihypertensive based on the patient's comorbidities.                                                                                         | SS, P     |
| Clonidine                                                           |                                                                                                  |                                                                                                                                                                                | B, SS     |
| Moxonidine                                                          |                                                                                                  |                                                                                                                                                                                | SS, CGE   |
| <b>ALPHA-ADRENERGIC RECEPTOR ANTAGONISTS</b>                        |                                                                                                  |                                                                                                                                                                                |           |
| Prazosin                                                            | Risk of orthostatic hypotension, especially in very elderly patients.                            | Evaluate the use of a preferred antihypertensive based on the patient's comorbidities. For benign prostatic hyperplasia, consider tamsulosin.                                  | B, P      |
| Terazosin                                                           |                                                                                                  |                                                                                                                                                                                | B, P      |
| Doxazosin                                                           |                                                                                                  |                                                                                                                                                                                | B, EU, P  |
| <b>OTHER HYPOTENSIVES</b>                                           |                                                                                                  |                                                                                                                                                                                |           |
| Nifedipine                                                          | Increased risk of hypotension, acute myocardial infarction, and mortality.                       | Evaluate other alternatives according to the indication.                                                                                                                       | EU, SS, P |
| <b>ANTIDEPRESSANTS, SELECTIVE SEROTONIN REUPTAKE INHIBITORS</b>     |                                                                                                  |                                                                                                                                                                                |           |
| Paroxetine                                                          | Increased risk of seizures, falls, fractures, and all-cause mortality. Anticholinergic effects.  | Consider first-line SSRIs in geriatrics: citalopram (maximum dose 20 mg/day) and sertraline.                                                                                   | B, EU, P  |
| Fluoxetine                                                          | Risk of central adverse effects (nausea, insomnia, dizziness, and confusion).                    |                                                                                                                                                                                | EU, P     |
| <b>ANTIDEPRESSANTS, NON-SELECTIVE MONOAMINE REUPTAKE INHIBITORS</b> |                                                                                                  |                                                                                                                                                                                |           |
| Imipramine                                                          | Anticholinergic adverse effects, sedation, orthostatic hypotension, and risk of falls.           | Use first-line antidepressants for major depression (SSRIs of choice in geriatrics, SNRIs) and use tricyclic antidepressants only when other alternatives have been exhausted. | B, P      |
| Clomipramine                                                        |                                                                                                  |                                                                                                                                                                                | B, P      |
| Nortriptyline                                                       |                                                                                                  |                                                                                                                                                                                | B, EU     |
| Doxepin                                                             |                                                                                                  |                                                                                                                                                                                | B, P      |

| List of Medications                 | Concern (risk/effect)                                                                                         | Alternative Treatment / Recommendation                                                                                                                                                                             | Criteria            |
|-------------------------------------|---------------------------------------------------------------------------------------------------------------|--------------------------------------------------------------------------------------------------------------------------------------------------------------------------------------------------------------------|---------------------|
| <b>OPIOIDS</b>                      |                                                                                                               |                                                                                                                                                                                                                    |                     |
| Pethidine (meperidine)              | Higher risk of neurotoxicity, including delirium, than other opioids.                                         | Evaluate the indication of pethidine. If a strong opioid is essential, the alternative of choice is morphine.                                                                                                      | B, P, CGE           |
| <b>BENZODIAZEPINES</b>              |                                                                                                               |                                                                                                                                                                                                                    |                     |
| Clonazepam                          | Risk of falls and fractures, decreased reflexes, psychiatric reactions, cognitive impairment, and depression. | When the use of benzodiazepines is essential, use at low doses preferably lorazepam and lormetazepam. Use the minimum effective dose for the shortest possible duration. Increase and withdraw the dose gradually. | B, SS               |
| Chlordiazepoxide                    |                                                                                                               |                                                                                                                                                                                                                    | B, SS, P            |
| Clorazepate                         |                                                                                                               |                                                                                                                                                                                                                    | B, SS, P            |
| Clobazam                            |                                                                                                               |                                                                                                                                                                                                                    | SS, P               |
| Diazepam                            |                                                                                                               |                                                                                                                                                                                                                    | B, EU, SS, P        |
| Diazepam in combination             |                                                                                                               |                                                                                                                                                                                                                    |                     |
| Flurazepam                          |                                                                                                               |                                                                                                                                                                                                                    | B, SS, P            |
| Ketazolam                           |                                                                                                               |                                                                                                                                                                                                                    | SS, CGE             |
| Bromazepam                          |                                                                                                               |                                                                                                                                                                                                                    | EU, SS, P           |
| Alprazolam                          |                                                                                                               |                                                                                                                                                                                                                    | B, EU, SS, P        |
| Loprazolam                          |                                                                                                               |                                                                                                                                                                                                                    | SS, CGE             |
| Triazolam                           |                                                                                                               |                                                                                                                                                                                                                    | B, SS, P            |
| Midazolam                           |                                                                                                               |                                                                                                                                                                                                                    | SS, CGE             |
| Brotizolam                          |                                                                                                               |                                                                                                                                                                                                                    | SS, P               |
| Medazepam with amitriptyline        | SS, P                                                                                                         |                                                                                                                                                                                                                    |                     |
| <b>NON-BENZODIAZEPINE HYPNOTICS</b> |                                                                                                               |                                                                                                                                                                                                                    |                     |
| Zopiclone                           | Risk of falls and fractures, decreased reflexes, psychiatric reactions, and cognitive impairment.             | Use the minimum effective dose for the shortest possible duration. Increase and withdraw the dose gradually.                                                                                                       | B, EU, SS, P, AEMPS |
| Zolpidem                            | Zolpidem: the recommended dose is 5 mg/day.                                                                   |                                                                                                                                                                                                                    |                     |

| List of Medications                                                                                                                                                                                                                                             | Concern (risk/effect)                                                                                                          | Alternative Treatment / Recommendation                                                                    | Criteria   |
|-----------------------------------------------------------------------------------------------------------------------------------------------------------------------------------------------------------------------------------------------------------------|--------------------------------------------------------------------------------------------------------------------------------|-----------------------------------------------------------------------------------------------------------|------------|
| <b>ANTITHROMBOTICS</b>                                                                                                                                                                                                                                          |                                                                                                                                |                                                                                                           |            |
| Ticlopidine                                                                                                                                                                                                                                                     | There are more effective and safer pharmacological alternatives.                                                               | For dual antiplatelet therapy, consider the use of aspirin in combination with clopidogrel or ticagrelor. | SS, P      |
| Dipyridamole                                                                                                                                                                                                                                                    | Risk of orthostatic hypotension.                                                                                               |                                                                                                           | B, EU      |
| Prasugrel                                                                                                                                                                                                                                                       | Higher exposure to the active metabolite of prasugrel. Not recommended for $\geq 75$ years.                                    |                                                                                                           | FT, P      |
| <b>OTHER DRUGS</b>                                                                                                                                                                                                                                              |                                                                                                                                |                                                                                                           |            |
| Pentoxifylline                                                                                                                                                                                                                                                  | Lack of demonstrated efficacy. Risk of falls and orthostatic hypotension, the latter risk is increased with most vasodilators. | --                                                                                                        | EU, P      |
| Diacerein                                                                                                                                                                                                                                                       | Not recommended in patients $\geq 65$ years due to risk of hepatotoxicity and diarrhea.                                        | --                                                                                                        | AEMPS, CGE |
| Phenobarbital                                                                                                                                                                                                                                                   | High risk of dependence, tolerance as a sedative, and overdose.                                                                | Consider other antiepileptics or sedatives based on the indication.                                       | B, P       |
| Piracetam                                                                                                                                                                                                                                                       | Lack of demonstrated efficacy.                                                                                                 | --                                                                                                        | EU, P      |
| Agomelatine                                                                                                                                                                                                                                                     | Efficacy not demonstrated in patients $\geq 75$ years and risk of hepatic toxicity.                                            | Consider first-line SSRIs in geriatrics: citalopram (maximum dose 20 mg/day) and sertraline.              | AEMPS, CGE |
| Medications included in:<br>1. 2 bibliographic databases (Beers 2019 [B], STOPP-START 2015 [SS], EU-PIM 2015, [EU], PRISCUS 2010 [P]);<br>2. Explicit recommendation of the technical sheet [FT];<br>3. AEMPS alert [AEMPS];<br>4. Expert group consensus [CGE] |                                                                                                                                |                                                                                                           |            |

*Table adapted from the reference 40 of the article*
