# Supplementary material for: Prevalence of potentially inappropriate medications and prescription dynamics in elderly hospitalized patients in Spain
Source: PubMed Central journal article supplement — BMC Geriatr. 2024 Sep 30;24:798. doi: 10.1186/s12877-024-05308-3 (PMC11443693; doi:10.1186/s12877-024-05308-3), 2024-09-30
Supplement: 12877_2024_5308_MOESM2_ESM.pdf [file 12877_2024_5308_MOESM2_ESM.pdf]

## Supplementary material

**Supplementary Table 2.** Distribution of potentially inappropriate medications (PIM) by sex

|                                             | <b>PIMs (N)</b> | <b>(%)</b>    | <b>Women (N)</b> | <b>(%)</b>  | <b>Men (N)</b> | <b>(%)</b>  |
|---------------------------------------------|-----------------|---------------|------------------|-------------|----------------|-------------|
|                                             | <b>1,407</b>    |               | <b>763</b>       | <b>54.2</b> | <b>644</b>     | <b>45.8</b> |
| Midazolam                                   | <b>244</b>      | <b>(17.3)</b> | 125              | (16.4)      | 119            | (18.5)      |
| Dexketoprofen                               | <b>241</b>      | <b>(17.1)</b> | 131              | (17.2)      | 110            | (17.1)      |
| Diazepam                                    | <b>160</b>      | <b>(11.4)</b> | 90               | (11.8)      | 70             | (10.9)      |
| Doxazosin*                                  | <b>159</b>      | <b>(11.3)</b> | 58               | (7.6)       | 101            | (15.7)      |
| Alprazolam*                                 | <b>97</b>       | <b>(6.9)</b>  | 68               | (8.9)       | 29             | (4.5)       |
| Paroxetine                                  | <b>76</b>       | <b>(5.4)</b>  | 48               | (6.3)       | 28             | (4.3)       |
| Clonazepam                                  | <b>72</b>       | <b>(5.1)</b>  | 45               | (5.9)       | 27             | (4.2)       |
| Zolpidem                                    | <b>64</b>       | <b>(4.5)</b>  | 34               | (4.5)       | 30             | (4.7)       |
| Pethidine (meperidine)                      | <b>61</b>       | <b>(4.3)</b>  | 34               | (4.5)       | 27             | (4.2)       |
| Bromazepam*                                 | <b>56</b>       | <b>(4.0)</b>  | 41               | (5.4)       | 15             | (2.3)       |
| Clorazepate                                 | <b>44</b>       | <b>(3.1)</b>  | 22               | (2.9)       | 22             | (3.4)       |
| Paraffin                                    | <b>25</b>       | <b>(1.8)</b>  | 10               | (1.3)       | 15             | (2.3)       |
| Fluoxetine                                  | <b>23</b>       | <b>(1.6)</b>  | 16               | (2.1)       | 7              | (1.1)       |
| Diclofenac                                  | <b>14</b>       | <b>(1.0)</b>  | 10               | (1.3)       | 4              | (0.6)       |
| Pentoxifylline*                             | <b>13</b>       | <b>(0.9)</b>  | 2                | (0.3)       | 11             | (1.7)       |
| Nifedipine                                  | <b>10</b>       | <b>(0.7)</b>  | 5                | (0.7)       | 5              | (0.8)       |
| Phenobarbital                               | <b>7</b>        | <b>(0.5)</b>  | 2                | (0.3)       | 5              | (0.8)       |
| Indomethacin                                | <b>6</b>        | <b>(0.4)</b>  | 2                | (0.3)       | 4              | (0.6)       |
| Clomipramine                                | <b>5</b>        | <b>(0.4)</b>  | 5                | (0.7)       | 0              | (0.0)       |
| Glimepiride                                 | <b>5</b>        | <b>(0.4)</b>  | 1                | (0.1)       | 4              | (0.6)       |
| Clobazam                                    | <b>4</b>        | <b>(0.3)</b>  | 3                | (0.4)       | 1              | (0.2)       |
| Ketazolam                                   | <b>4</b>        | <b>(0.3)</b>  | 3                | (0.4)       | 1              | (0.2)       |
| Megestrol                                   | <b>4</b>        | <b>(0.3)</b>  | 3                | (0.4)       | 1              | (0.2)       |
| Loprazolam                                  | <b>2</b>        | <b>(0.1)</b>  | 1                | (0.1)       | 1              | (0.2)       |
| Agomelatine                                 | <b>1</b>        | <b>(0.1)</b>  | 0                | (0.0)       | 1              | (0.2)       |
| Clonidine                                   | <b>1</b>        | <b>(0.1)</b>  | 0                | (0.0)       | 1              | (0.2)       |
| Diazepam in combination                     | <b>1</b>        | <b>(0.1)</b>  | 1                | (0.1)       | 0              | (0.0)       |
| Etoricoxib                                  | <b>1</b>        | <b>(0.1)</b>  | 0                | (0.0)       | 1              | (0.2)       |
| Flurazepam                                  | <b>1</b>        | <b>(0.1)</b>  | 1                | (0.1)       | 0              | (0.0)       |
| Medazepam in combination with amitriptyline | <b>1</b>        | <b>(0.1)</b>  | 1                | (0.1)       | 0              | (0.0)       |
| Meloxicam                                   | <b>1</b>        | <b>(0.1)</b>  | 1                | (0.1)       | 0              | (0.0)       |
| Methyldopa                                  | <b>1</b>        | <b>(0.1)</b>  | 0                | (0.0)       | 1              | (0.2)       |
| Nitrofurantoin                              | <b>1</b>        | <b>(0.1)</b>  | 0                | (0.0)       | 1              | (0.2)       |
| Prasugrel                                   | <b>1</b>        | <b>(0.1)</b>  | 0                | (0.0)       | 1              | (0.2)       |
| Ticlopidine                                 | <b>1</b>        | <b>(0.1)</b>  | 0                | (0.0)       | 1              | (0.2)       |

Note: \*  $\chi^2$  test:  $p < 0.001$
